# Supplementary material
Source: publisher site journal article supplement (https://www.dovepress.com/get_supplementary_file.php?f=305145.docx)

Supplementary materials

| **Stage** | **Review** | | | | | **Referral** |
| --- | --- | --- | --- | --- | --- | --- |
| **Task No.** | 10 | 11 | 12 | 13 | 14 | 15 |
| **Task name** | **Read the letter** | **Walk** | **Answer questions**  **for review** | **Offered the PR class** | **Request information about PR** | **Read the letter** |
| **Vision** | 12 | 12 | 0 | 0 | **>** | 0 |
| **Hearing** | 0 | 4 | 8 | 8 | 8 | 0 |
| **Concentration** | 4 | 4 | 8 | 8 | 8 | 4 |
| **Memory** | 12 | 8 | 12 | 12 | 0 | 12 |
| **Literacy** | 12 | 4 | 0 | 0 | **>** | 12 |
| **Speech Comp.** | 0 | 0 | 8 | 8 | 8 | 0 |
| **Speaking** | 0 | 0 | 12 | 12 | 12 | 0 |
| **Strength** | 0 | 0 | 0 | 0 | 0 | 0 |
| **Dexterity** | 0 | 0 | 0 | 0 | 0 | 0 |
| **Forward/Up** | 0 | 0 | 0 | 0 | 0 | 0 |
| **Down** | 0 | 0 | 0 | 0 | 0 | 0 |
| **Strength** | 1 | 0 | 0 | 0 | 0 | 1 |
| **Dexterity** | 8 | 0 | 0 | 0 | 0 | 8 |
| **Forward/Up** | 4 | 0 | 0 | 0 | 0 | 4 |
| **Down** | 0 | 0 | 0 | 0 | 0 | 0 |
| **Walking** | 0 | 4 | 0 | 0 | 0 | 0 |
| **Stairs** | 0 | 0 | 0 | 0 | 0 | 0 |
| **Standing** | 0 | 0 | 0 | 0 | 0 | 0 |

**Table S1** Demand on every task of PR service based on Mrs Smith’s scenario

| **Stage** | **Diagnosis** | | | | | | | | |
| --- | --- | --- | --- | --- | --- | --- | --- | --- | --- |
| **Task No.** | 1 | 2 | 3 | 4 | 5 | 6 | 7 | 8 | 9 |
| **Task name** | **Walk** | **Describe symptoms** | **Wait 20 mins** | **Go to the nurse's office** | **Describe symptoms** | **Read letter** | **Open the package (inhalers)** | **Read the instructions**  **(inhalers)** | **Use the inhalers** |
| **Vision** | 12 | 0 | 0 | 10 | 0 | **>** | 10 | **>** | 10 |
| **Hearing** | 4 | 8 | 4 | 0 | 8 | 0 | 0 | 0 | 0 |
| **Concentration** | 4 | 4 | 4 | 4 | 4 | 0 | 4 | 8 | 8 |
| **Memory** | 8 | 8 | 4 | 0 | 8 | 0 | 0 | 12 | 12 |
| **Literacy** | 4 | 0 | 0 | 4 | 0 | **>** | 4 | 8 | 0 |
| **Speech Comp.** | 0 | 8 | 4 | 0 | 8 | 0 | 0 | 0 | 0 |
| **Speaking** | 0 | 12 | 4 | 0 | 12 | 0 | 0 | 0 | 0 |
| **Strength** | 0 | 0 | 0 | 0 | 0 | 0 | 0 | 0 | 3 |
| **Dexterity** | 0 | 0 | 0 | 0 | 0 | 0 | 0 | 0 | 4 |
| **Forward/Up** | 0 | 0 | 0 | 0 | 0 | 0 | 0 | 0 | 6 |
| **Down** | 0 | 0 | 0 | 0 | 0 | 0 | 0 | 0 | 0 |
| **Strength** | 0 | 0 | 0 | 0 | 0 | 1 | 1 | 1 | 0 |
| **Dexterity** | 0 | 0 | 0 | 0 | 0 | 8 | 8 | 8 | 0 |
| **Forward/Up** | 0 | 0 | 0 | 0 | 0 | 4 | 4 | 4 | 0 |
| **Down** | 0 | 0 | 0 | 0 | 0 | 0 | 0 | 0 | 0 |
| **Walking** | 4 | 0 | 0 | 2 | 0 | 0 | 0 | 0 | 0 |
| **Stairs** | 0 | 0 | 0 | 0 | 0 | 0 | 0 | 0 | 0 |
| **Standing** | 0 | 0 | 0 | 0 | 0 | 0 | 0 | 0 | 0 |

**Table S1** Demand on every task of PR service based on Mrs Smith’s scenario (continued)

| **Stage** | **Assessment** | | | | | | | | | |
| --- | --- | --- | --- | --- | --- | --- | --- | --- | --- | --- |
| **Task No.** | 16 | 17 | 18 | 19 | 20 | 21 | 22 | 23 | 24 | 25 |
| **Task name** | **Ask her husband to help drive** | **Read the instructions for travel in referral letter** | **Walk and stop to rest after every 50m of walking  (in total 300m distance)** | **Provide invitation and medication to be checked** | **Fill in question-aires** | **Walking test** | **Obtain more info about PR** | **Request to tailor the class schedule** | **Obtain the tailored class schedule** | **Agree and wait to attend** |
| **Vision** | 0 | **>** | 12 | 0 | 12 | 10 | 0 | 0 | 0 | 0 |
| **Hearing** | 8 | 0 | 0 | 8 | 0 | 8 | 8 | 8 | 8 | 0 |
| **Concentration** | 4 | 8 | 4 | 8 | 10 | 12 | 8 | 8 | 4 | 0 |
| **Memory** | 0 | 0 | 0 | 12 | 12 | 0 | 0 | 0 | 12 | **>** |
| **Literacy** | 0 | 8 | 4 | 0 | 8 | 0 | 0 | 0 | 0 | 0 |
| **Speech Comp.** | 8 | 0 | 0 | 8 | 8 | 8 | 8 | 8 | 8 | 0 |
| **Speaking** | 8 | 0 | 0 | 12 | 8 | 8 | 8 | 8 | 0 | 0 |
| **Strength** | 0 | 0 | 0 | 2 | 2 | 0 | 0 | 0 | 0 | 0 |
| **Dexterity** | 0 | 6 | 0 | 0 | 0 | 0 | 0 | 0 | 0 | 0 |
| **Forward/Up** | 0 | 4 | 0 | 4 | 4 | 0 | 0 | 0 | 0 | 0 |
| **Down** | 0 | 0 | 0 | 0 | 0 | 0 | 0 | 0 | 0 | 0 |
| **Strength** | 0 | 0 | 0 | 0 | 0 | 0 | 0 | 0 | 0 | 0 |
| **Dexterity** | 0 | 0 | 0 | 0 | 0 | 0 | 0 | 0 | 0 | 0 |
| **Forward/Up** | 0 | 0 | 0 | 0 | 0 | 0 | 0 | 0 | 0 | 0 |
| **Down** | 0 | 0 | 0 | 0 | 0 | 0 | 0 | 0 | 0 | 0 |
| **Walking** | 0 | 0 | **10** | 0 | 0 | 0 | 0 | 0 | 0 | 0 |
| **Stairs** | 0 | 0 | 0 | 0 | 0 | 0 | 0 | 0 | 0 | 0 |
| **Standing** | 0 | 0 | 0 | 0 | 0 | 0 | 0 | 0 | 0 | 0 |

| **Stage** | **PR** | | | | | **Overall**  **demand** |
| --- | --- | --- | --- | --- | --- | --- |
| **Task No.** | 26 | 27 | 28 | 29 | 30 |
| **Task name** | **Drive to the same place of assessment** | **Walk and stop 4-5 times to rest**  **(in total 300m)** | **Find out about the transport service** | **Request transport service** | **Decide to quit** |
| **Vision** | 12 | 12 | 8 | 0 | 12 | **>** |
| **Hearing** | 8 | 0 | 0 | 8 | 8 | 8 |
| **Concentration** | 12 | 4 | 4 | 4 | 12 | 12 |
| **Memory** | 12 | 0 | 4 | 12 | 12 | **>** |
| **Literacy** | 4 | 4 | 0 | 0 | 4 | **>** |
| **Speech Comp.** | 0 | 0 | 0 | 8 | 0 | 8 |
| **Speaking** | 0 | 0 | 0 | 8 | 0 | 12 |
| **Strength** | 8 | 0 | 0 | 0 | 8 | 8 |
| **Dexterity** | 4 | 0 | 0 | 0 | 4 | 6 |
| **Forward/Up** | 6 | 0 | 0 | 0 | 6 | 6 |
| **Down** | 0 | 0 | 0 | 0 | 0 | 0 |
| **Strength** | 8 | 0 | 0 | 0 | 8 | 8 |
| **Dexterity** | 4 | 0 | 0 | 0 | 4 | 8 |
| **Forward/Up** | 6 | 0 | 0 | 0 | 6 | 6 |
| **Down** | 0 | 0 | 0 | 0 | 0 | 0 |
| **Walking** | 0 | **10** | 0 | 0 | **10** | **10** |
| **Stairs** | 0 | 0 | 0 | 0 | 0 | 0 |
| **Standing** | 0 | 0 | 0 | 0 | 0 | 0 |

**Figure S1:** The pre-defined (demand measure) scales


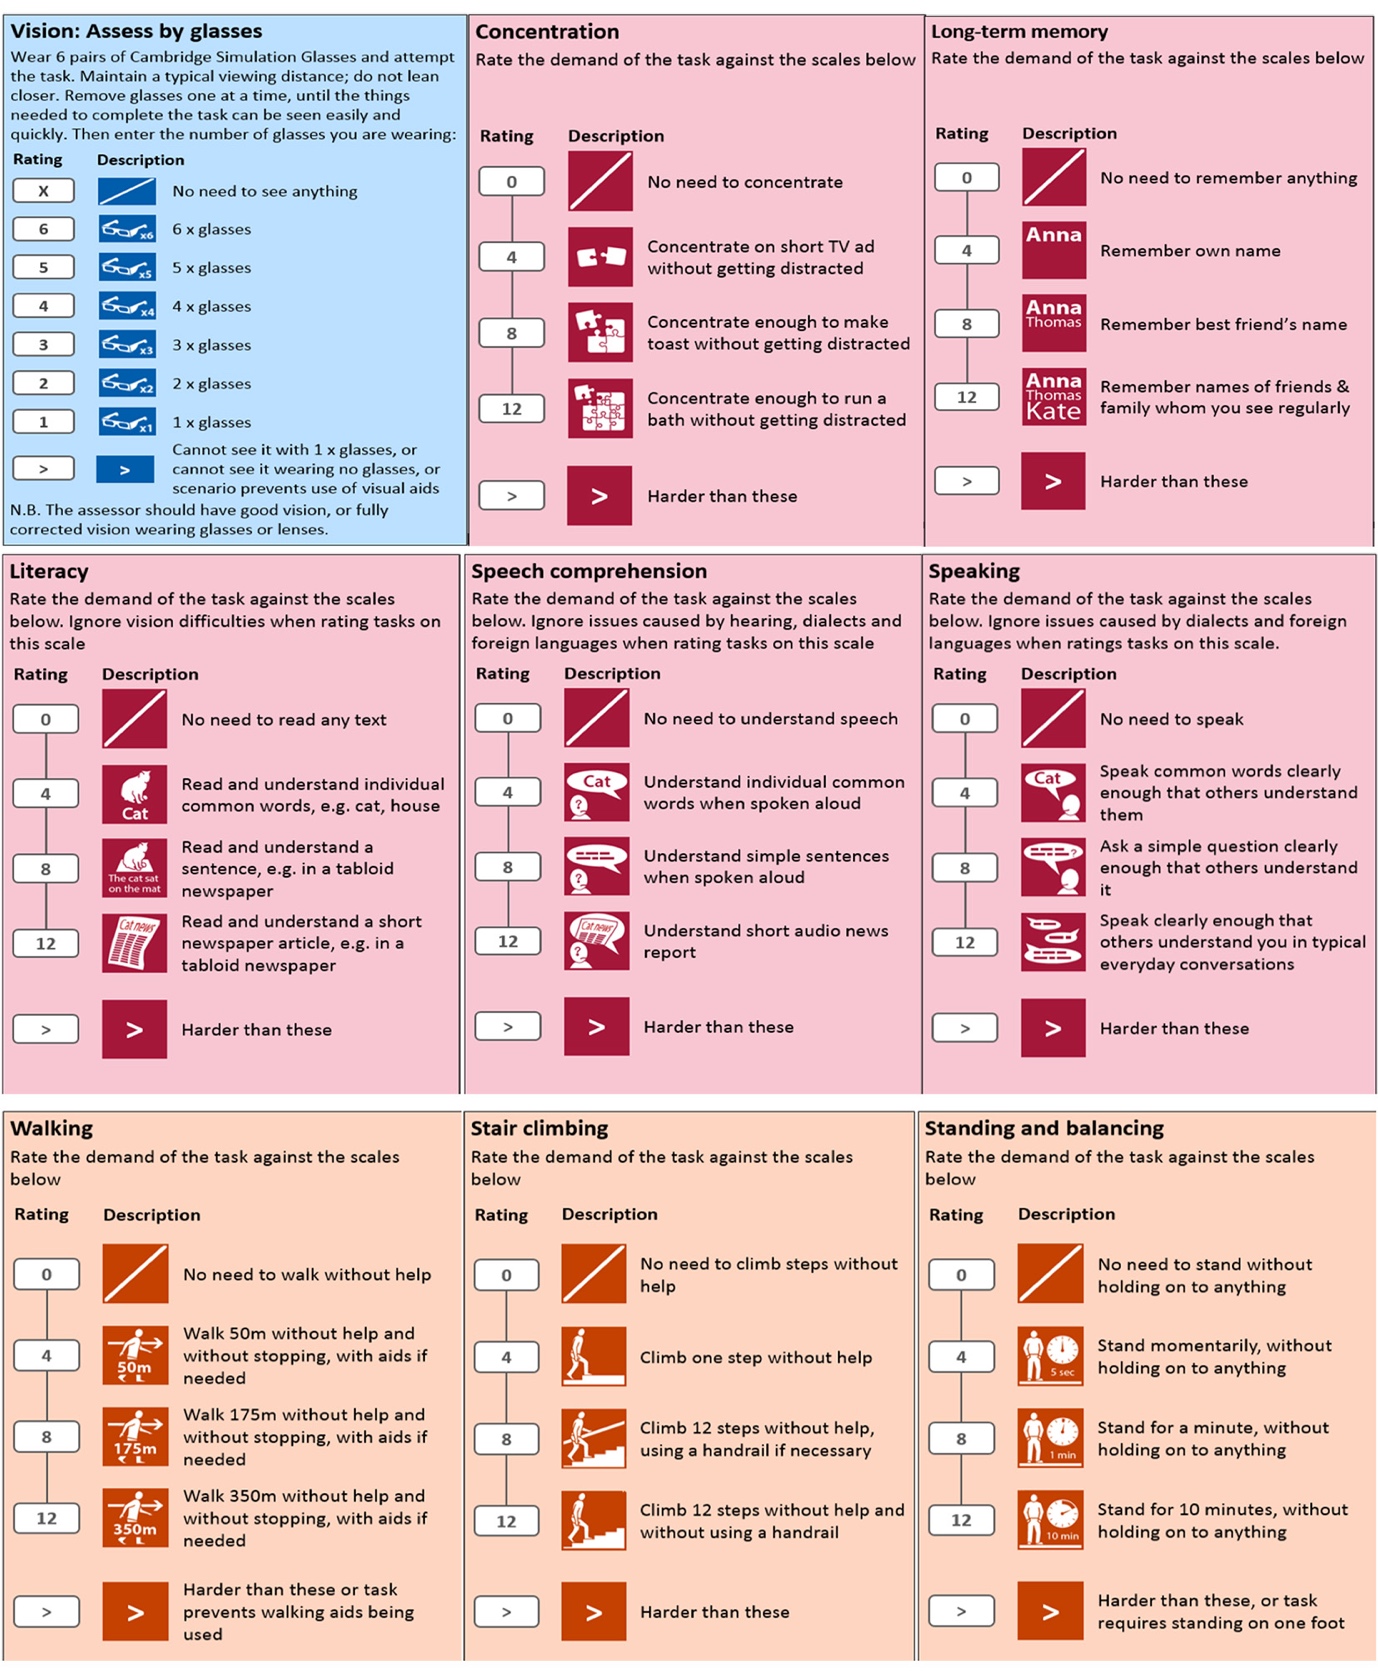


**Figure S1:** The pre-defined (demand measure) scales (continued)


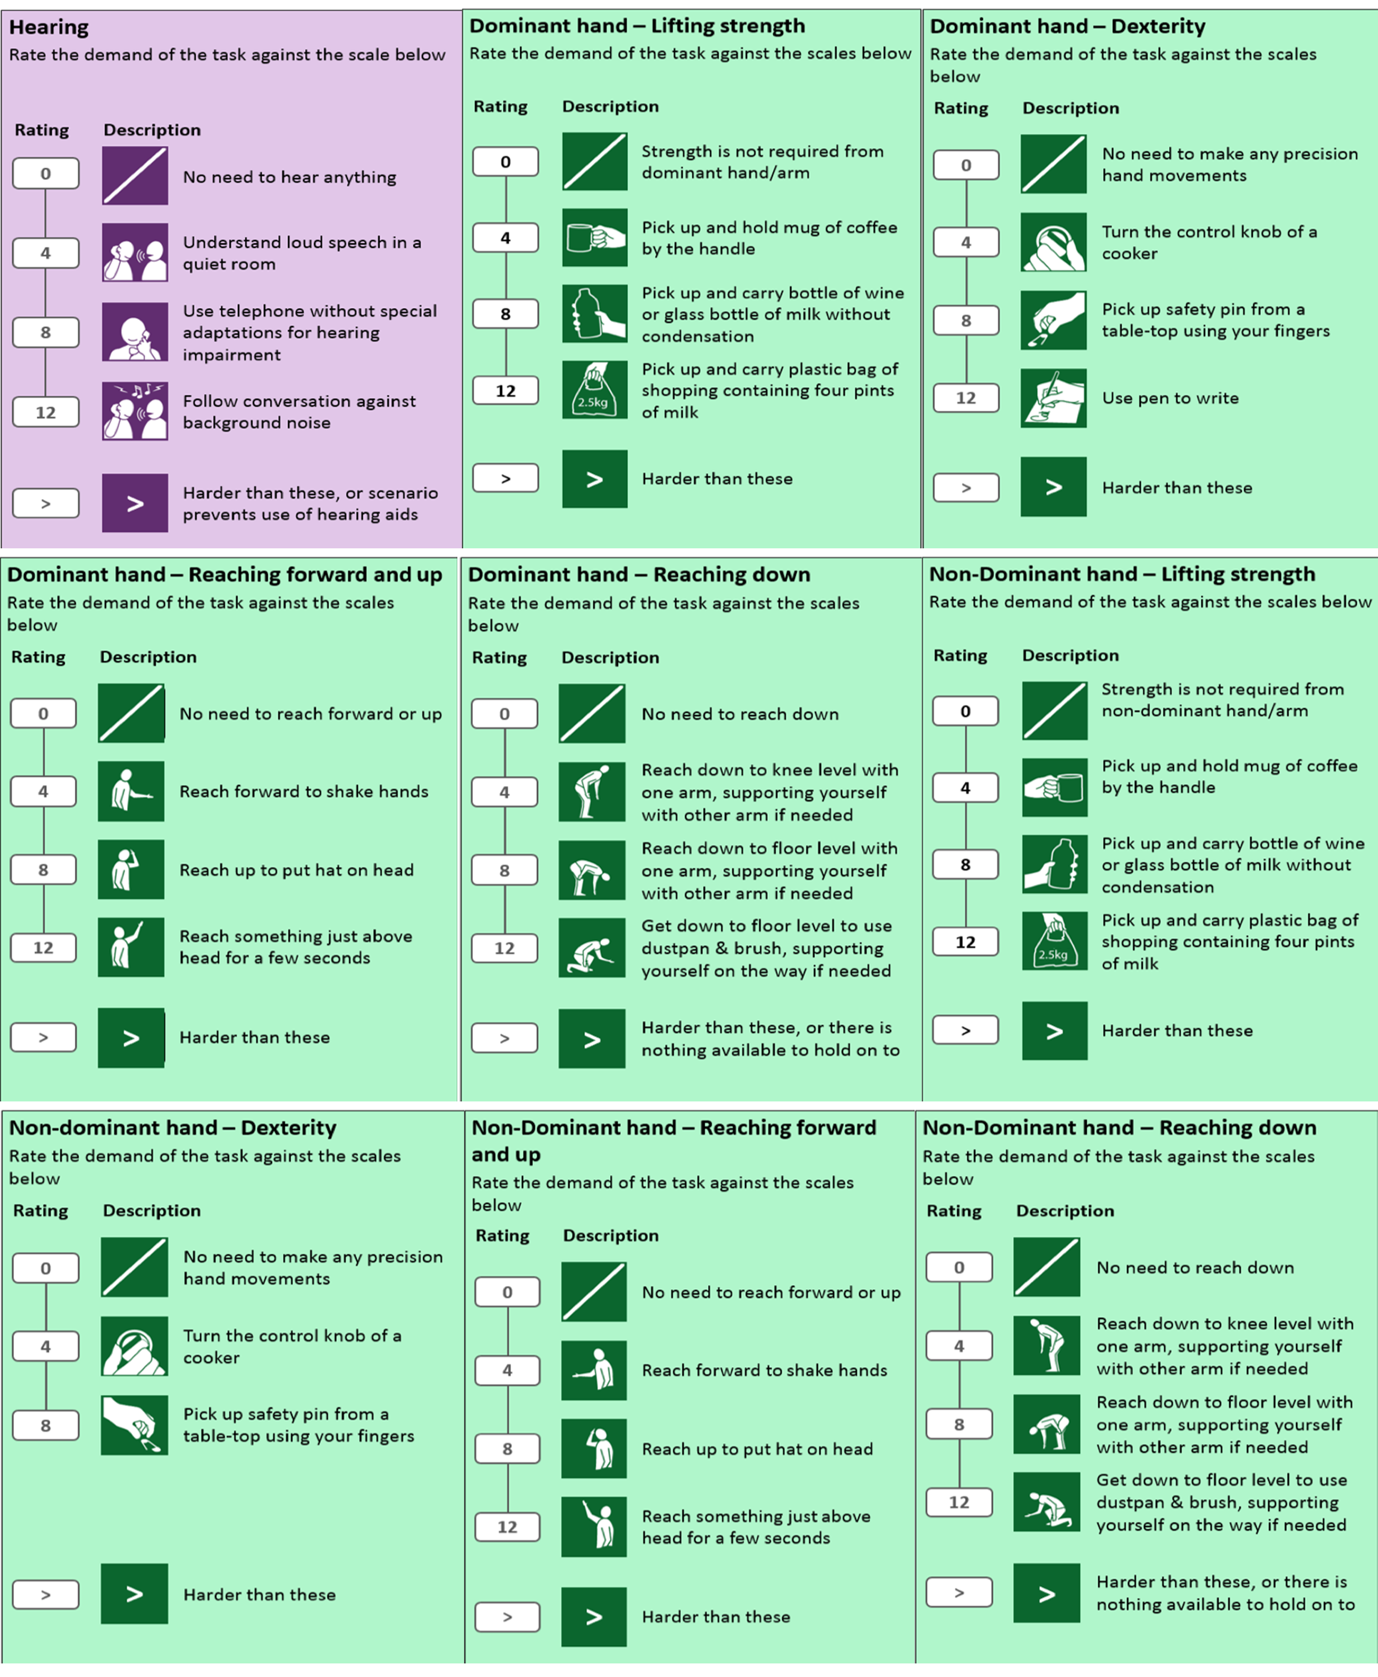


**Figure S2:** Your COPD Care Reminder final version


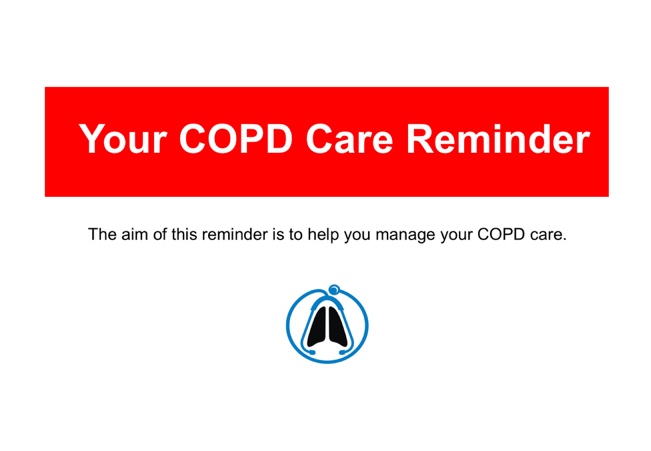

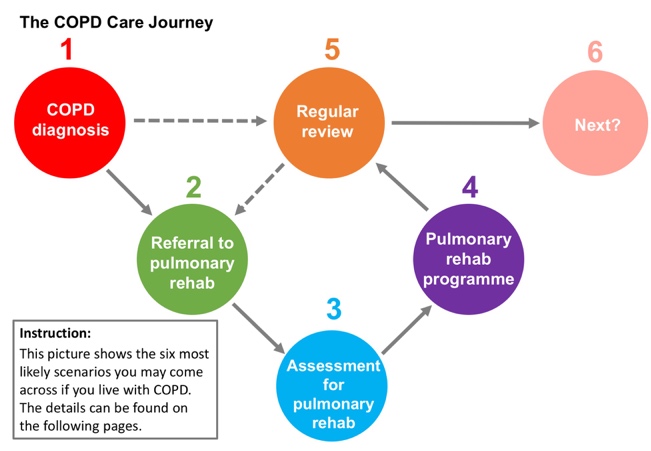


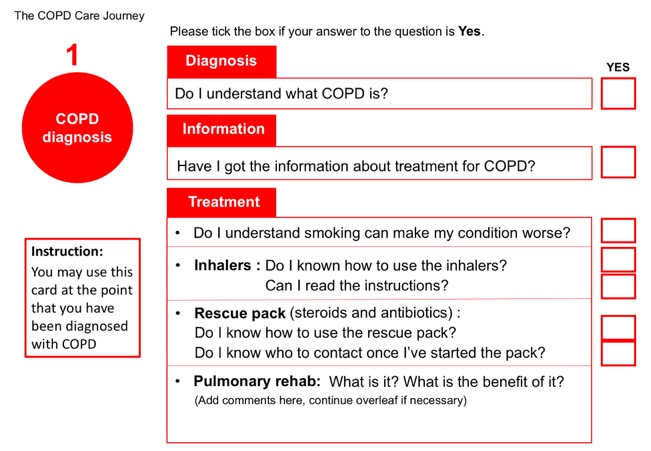

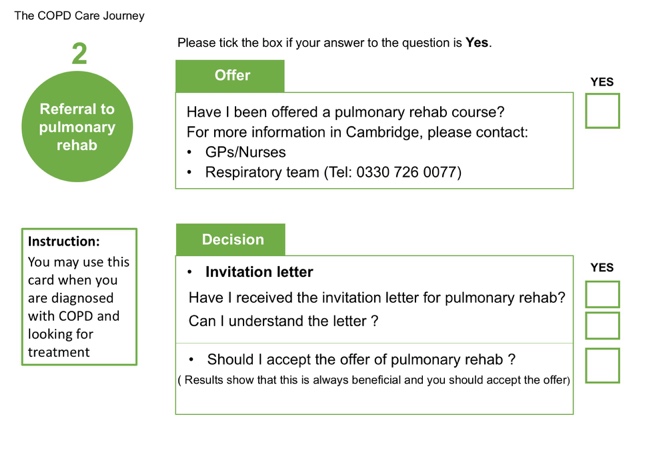


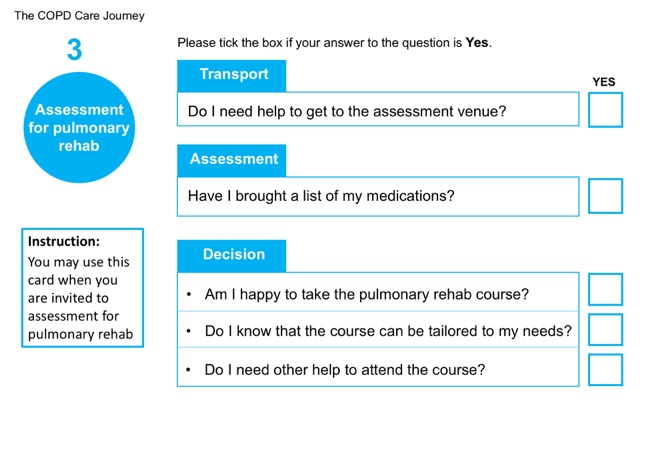

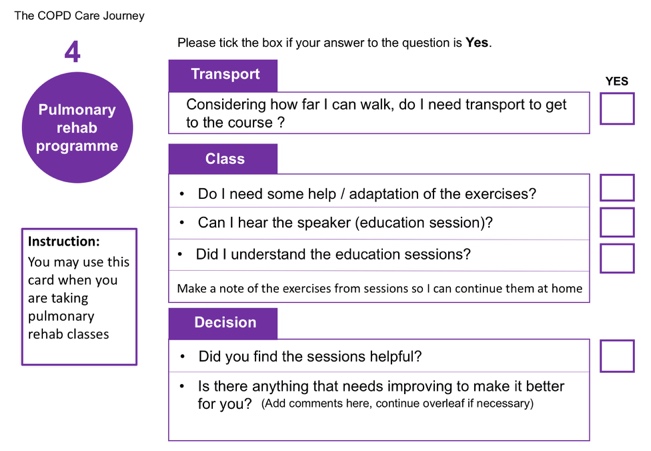


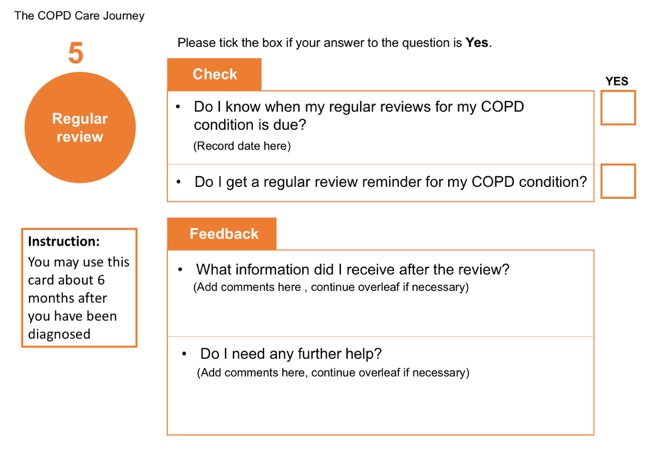

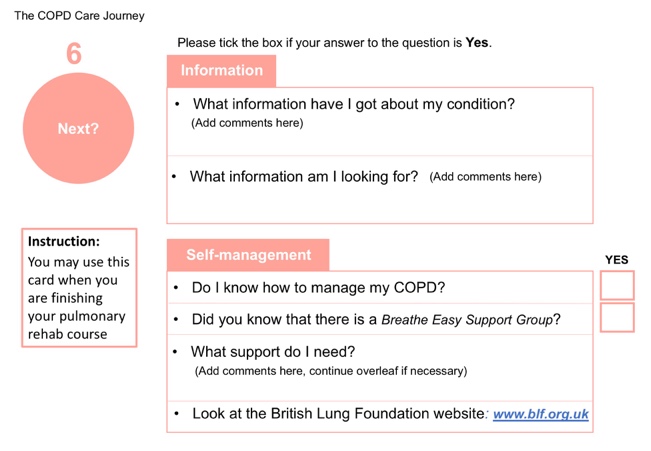

Supplement: Supplementary file 1 [file get_supplementary_file.php]
